# Supplementary material for: A Budget Impact Model to Estimate the Environmental Impact of Adopting RESPIMAT® Re-usable in the Nordics and Benelux
Source: Springer Nature journal article supplement (doi:10.1007/s12325-019-01114-1), 2019-10-17
Supplement: MOESM1 [file 17284282]

**APPENDIX**

Table 5 Cumulative results of total incremental cost (€) between 2019 and 2023: One-way sensitivity analysis

| *Values used in Base case/Sensitivity 1/Sensitivity 2* | Base case | Sensitivity 1 | Sensitivity 2 |
| --- | --- | --- | --- |
| **Treatment pattern**  *(Moderately optimised/Current/Most optimal)* | -205 888 | 15 334 | -353 594 |
| **Treatment costs**  *(Price-parity/Price increase of 2%/Price discount of 2%)* | -205 888 | 11 394 643 | -11 806 422 |
| **Product carbon footprint of Respimat re-usable**  *(3% higher/10% higher/10%*  *lower PCF compared to Respimat disposable)* | -205 888 | -185 299 | -244 415 |
| **Societal cost of carbon**  *(43.65€/21.83%/87.30€)* | -205 888 | -102 944 | -411 776 |
| **Study population**  *(Annual average change of 2.5%/-2.5%/5%)* | -205 888 | -201 340 | -214 989 |

Table 6 Ex-factory price in 2019 € per country, treatment pattern and brand

|  | Belgium & Luxembourg | | | Denmark & Iceland  (1 € = 7.45 DKK) | | | Finland | | |
| --- | --- | --- | --- | --- | --- | --- | --- | --- | --- |
|  | Spiriva | Spiolto | Striverdi | Spiriva | Spiolto | Striverdi | Spiriva | Spiolto | Striverdi |
| Respimat® disposable (D1) | 27.84 | 43.50 | N/a | 43.92 | 64.65 | 42.40 | 31.64 | 43.30 | 24.31 |
| Respimat® disposable (D3) | 74.38 | 135.46 | N/a | N/a | 190.19 | N/a | N/a | N/a | N/a |
| Respimat® re-usable (N1) | 27.84 | 43.50 | N/a | 43.92 | 64.65 | 42.40 | 31.64 | 43.30 | 24.31 |
| Respimat® re-usable (R1) | 27.84 | 43.50 | N/a | 43.92 | 64.65 | 42.40 | 31.64 | 43.30 | 24.31 |
| Respimat® re-usable (N3) | 83.52 | 130.50 | N/a | 131.75 | 193.95 | N/a | 94.92 | 129.90 | N/a |
| Respimat® re-usable (R3) | 83.52 | 130.50 | N/a | 131.75 | 193.95 | N/a | 94.92 | 129.90 | N/a |
|  | Netherlands | | | Norway  (1 € = 9.59 NKK) | | | Sweden  (1 € = 10.26 SEK) | | |
|  | Spiriva | Spiolto | Striverdi | Spiriva | Spiolto | Striverdi | Spiriva | Spiolto | Striverdi |
| Respimat® disposable (D1) | 31.00 | 45.01 | 29.75 | 28.56 | 37.77 | 20.88 | 29.33 | 39.52 | 24.27 |
| Respimat® disposable (D3) | N/a | N/a | N/a | N/a | 113.30 | N/a | N/a | 118.56 | N/a |
| Respimat® re-usable (N1) | 31.00 | 45.01 | 29.75 | 28.56 | 37.77 | 20.88 | 29.33 | 39.52 | 24.27 |
| Respimat® re-usable (R1) | 31.00 | 45.01 | 29.75 | 28.56 | 37.77 | 20.88 | 29.33 | 39.52 | 24.27 |
| Respimat® re-usable (N3) | 93.00 | 135.03 | N/a | 85.69 | 113.30 | N/a | 87.99 | 118.56 | N/a |
| Respimat® re-usable (R3) | 93.00 | 135.03 | N/a | 85.69 | 113.30 | N/a | 87.99 | 118.56 | N/a |

Table 7 Population estimates by country and brand

|  | 2019 | 2020 | 2021 | 2022 | 2023 |
| --- | --- | --- | --- | --- | --- |
| Belgium & Luxembourg |  |  |  |  |  |
| *Spiriva RMT* | 14382 | 12623 | 11517 | 10503 | 9508 |
| *Striverdi* | 0 | 0 | 0 | 0 | 0 |
| *Spiolto* | 9081 | 11768 | 13828 | 15902 | 17492 |
| Denmark and Iceland |  |  |  |  |  |
| *Spiriva RMT* | 21981 | 20901 | 20062 | 19667 | 20925 |
| *Striverdi* | 384 | 382 | 393 | 391 | 409 |
| *Spiolto* | 16664 | 18373 | 21145 | 23259 | 24887 |
| Finland |  |  |  |  |  |
| *Spiriva RMT* | 18906 | 16770 | 15633 | 14505 | 13378 |
| *Striverdi* | 281 | 242 | 209 | 192 | 174 |
| *Spiolto* | 5595 | 6761 | 7843 | 847 | 9148 |
| Netherlands |  |  |  |  |  |
| *Spiriva RMT* | 80618 | 77144 | 75087 | 70026 | 64424 |
| *Striverdi* | 1663 | 1500 | 1500 | 1500 | 1500 |
| *Spiolto* | 33980 | 44542 | 55678 | 62637 | 65769 |
| Norway |  |  |  |  |  |
| *Spiriva RMT* | 16953 | 16197 | 15395 | 14633 | 13909 |
| *Striverdi* | 575 | 575 | 575 | 575 | 575 |
| *Spiolto* | 7040 | 8307 | 9387 | 10514 | 11565 |
| Sweden |  |  |  |  |  |
| *Spiriva RMT* | 23802 | 23900 | 22354 | 21134 | 19885 |
| *Striverdi* | 526 | 517 | 517 | 517 | 517 |
| *Spiolto* | 9549 | 11268 | 1262 | 13504 | 14179 |
| Total |  |  |  |  |  |
| *Spiriva RMT* | 176642 | 167535 | 160048 | 150468 | 142029 |
| *Striverdi* | 3429 | 3216 | 3194 | 3175 | 3175 |
| *Spiolto* | 81909 | 101019 | 109143 | 126663 | 143040 |

Table 8 Cumulative results between 2019 and 2023, by country: Analysis 1 – Moderately optimised

|  | Scenario with RESPIMAT® re-usable | Scenario without RESPIMAT® re-usable | Incremental |
| --- | --- | --- | --- |
| Belgium/Luxembourg |  |  |  |
| No. of inhalers (n) | 871 120 | 1 519 248 | -648 128 |
| Carbon emissions (tons) | 768 | 1 177 | -410 |
| Treatment cost (€) | 55 087 767 | 55 087 767 | 0 |
| Cost of carbon emissions (€) | 33 507 | 51 394 | -17 887 |
| Denmark/Iceland |  |  |  |
| No. of inhalers (n) | 1 340 253 | 2 517 876 | -1 177 623 |
| Carbon emissions (tons) | 1 207 | 1 951 | -744 |
| Treatment cost (€) | 136 499 457 | 136 499 457 | 0 |
| Cost of carbon emissions (€) | 52 698 | 85 177 | -32 478 |
| Finland |  |  |  |
| No. of inhalers (n) | 785 921 | 1 325 808 | -539 887 |
| Carbon emissions (tons) | 686 | 1 028 | -341 |
| Treatment cost (€) | 46 076 730 | 46 076 730 | 0 |
| Cost of carbon emissions (€) | 29 961 | 44 850 | -14 889 |
| Netherlands |  |  |  |
| No. of inhalers (n) | 4 129 232 | 7 650 816 | -3 521 585 |
| Carbon emissions (tons) | 3 705 | 5 929 | -2 225 |
| Treatment cost (€) | 281 209 672 | 281 209 672 | 0 |
| Cost of carbon emissions (€) | 161 713 | 258 818 | -97 105 |
| Norway |  |  |  |
| No. of inhalers (n) | 831 884 | 1 521 300 | -689 416 |
| Carbon emissions (tons) | 744 | 1 179 | -435 |
| Treatment cost (€) | 48 358 945 | 48 358 945 | 0 |
| Cost of carbon emissions (€) | 32 469 | 51 464 | -18 995 |
| Sweden |  |  |  |
| No. of inhalers (n) | 1 071 190 | 1 961 172 | -889 982 |
| Carbon emissions (tons) | 958 | 1 520 | -562 |
| Treatment cost (€) | 63 447 517 | 63 447 517 | 0 |
| Cost of carbon emissions (€) | 41 811 | 66 344 | -24 533 |

Table 9 Cumulative results between 2019 and 2023, by country: Analysis 2- Highly optimised

|  | Scenario with RESPIMAT® re-usable | Scenario without RESPIMAT® re-usable | Incremental |
| --- | --- | --- | --- |
| Belgium/Luxembourg |  |  |  |
| No. of inhalers (n) | 655 078 | 1 519 248 | -864 170 |
| Carbon emissions (tons) | 621 | 1 177 | -556 |
| Treatment cost (€) | 55 087 767 | 55 087 767 | 0 |
| Cost of carbon emissions (€) | 27 106 | 51 394 | -24 288 |
| Denmark/Iceland |  |  |  |
| No. of inhalers (n) | 947 712 | 2 517 876 | -1 570 164 |
| Carbon emissions (tons) | 941 | 1 951 | -1 011 |
| Treatment cost (€) | 136 499 457 | 136 499 457 | 0 |
| Cost of carbon emissions (€) | 41 068 | 85 177 | -44 109 |
| Finland |  |  |  |
| No. of inhalers (n) | 605 958 | 1 325 808 | -719 850 |
| Carbon emissions (tons) | 564 | 1 028 | -463 |
| Treatment cost (€) | 46 076 730 | 46 076 730 | 0 |
| Cost of carbon emissions (€) | 24 629 | 44 850 | -20 221 |
| Netherlands |  |  |  |
| No. of inhalers (n) | 2 955 370 | 7 650 816 | -4 695 446 |
| Carbon emissions (tons) | 2 908 | 5 929 | -3 021 |
| Treatment cost (€) | 281 209 672 | 281 209 672 | 0 |
| Cost of carbon emissions (€) | 126 933 | 258 818 | -131 885 |
| Norway |  |  |  |
| No. of inhalers (n) | 602 079 | 1 521 300 | -919 221 |
| Carbon emissions (tons) | 588 | 1 179 | -591 |
| Treatment cost (€) | 48 358 945 | 48 358 945 | 0 |
| Cost of carbon emissions (€) | 25 660 | 51 464 | -25 803 |
| Sweden |  |  |  |
| No. of inhalers (n) | 774 529 | 1 961 172 | -1 186 643 |
| Carbon emissions (tons) | 757 | 1 520 | -763 |
| Treatment cost (€) | 63 447 517 | 63 447 517 | 0 |
| Cost of carbon emissions (€) | 33 021 | 66 344 | -33 323 |

Table 10 Cumulative results between 2019 and 2023, by country: Analysis 3- Most optimal

|  | Scenario with RESPIMAT® re-usable | Scenario without RESPIMAT® re-usable | Incremental |
| --- | --- | --- | --- |
| Belgium/Luxembourg |  |  |  |
| No. of inhalers (n) | 439 035 | 1 519 248 | -1 080 213 |
| Carbon emissions (tons) | 474 | 1 177 | -704 |
| Treatment cost (€) | 55 087 767 | 55 087 767 | 0 |
| Cost of carbon emissions (€) | 20 685 | 51 394 | -30 709 |
| Denmark/Iceland |  |  |  |
| No. of inhalers (n) | 555 171 | 2 517 876 | -1 962 705 |
| Carbon emissions (tons) | 674 | 1 951 | -1 278 |
| Treatment cost (€) | 136 499 457 | 136 499 457 | 0 |
| Cost of carbon emissions (€) | 29 402 | 85 177 | -55 774 |
| Finland |  |  |  |
| No. of inhalers (n) | 425 996 | 1 325 808 | -899 812 |
| Carbon emissions (tons) | 442 | 1 028 | -586 |
| Treatment cost (€) | 46 076 730 | 46 076 730 | 0 |
| Cost of carbon emissions (€) | 19 281 | 44 850 | -25 570 |
| Netherlands |  |  |  |
| No. of inhalers (n) | 1 781 509 | 7 650 816 | -5 869 308 |
| Carbon emissions (tons) | 2 109 | 5 929 | -3 821 |
| Treatment cost (€) | 281 209 672 | 281 209 672 | 0 |
| Cost of carbon emissions (€) | 92 048 | 258 818 | -166 770 |
| Norway |  |  |  |
| No. of inhalers (n) | 372 274 | 1 521 300 | -1 149 026 |
| Carbon emissions (tons) | 431 | 1 179 | -748 |
| Treatment cost (€) | 48 358 945 | 48 358 945 | 0 |
| Cost of carbon emissions (€) | 18 831 | 51 464 | -32 633 |
| Sweden |  |  |  |
| No. of inhalers (n) | 477 868 | 1 961 172 | -1 483 304 |
| Carbon emissions (tons) | 555 | 1 520 | -965 |
| Treatment cost (€) | 63 447 517 | 63 447 517 | 0 |
| Cost of carbon emissions (€) | 24 205 | 66 344 | -42 139 |

Table 8 Cumulative results between 2019 and 2023, by country: Analysis 4- Moderately optimised with 2% discount for R1*

|  | Scenario with RESPIMAT® re-usable | Scenario without RESPIMAT® re-usable | Incremental |
| --- | --- | --- | --- |
| Treatment cost (€) |  |  |  |
| Belgium/Luxembourg | 54 612 486 | 55 087 767 | -475 281 |
| Denmark/Iceland | 135 217 967 | 136 499 457 | -1 281 490 |
| Finland | 45 699 042 | 46 076 730 | -377 688 |
| Netherlands | 278 606 219 | 281 209 672 | -2 603 453 |
| Norway | 47 916 314 | 48 358 945 | -442 631 |
| Sweden | 62 868 994 | 63 447 517 | -578 523 |
| **Total** | **624 921 020** | **630 680 087** | **-5 759 066** |

** In terms of inhaler devices (n), carbon emissions (ton), and cost of carbon emissions (€), this Analysis is identical to Analysis 1*
